# Supplementary material for: DIRseq as a method for predicting drug-interacting residues of intrinsically disordered proteins from sequences
Source: eLife. 2025 Oct 7;14:RP107470. doi: 10.7554/eLife.107470 (PMC12503486; doi:10.7554/eLife.107470)
Supplement: Figure 3—source data 1. [file elife-107470-fig3-data1.xlsx]

## Sheet: Fiogure 3a
AA	resnum	DIRseq	N CSP (ppb)	shading
			16.2184	32.4367
A	330	2.83
A	331	1.59
G	332	0.74
S	333	0.49
S	334	0.42
G	335	0.46
T	336	0.69	8.54
L	337	1.14	5.82
E	338	1.59	2.24
L	339	1.45	8.16
P	340	1.16
S	341	1.03	0.4
T	342	1.11
L	343	1.33	11.15
S	344	1.92	8.98
L	345	4.12	7.06
Y	346	8.69	9.01
K	347	7.55	7.06
S	348	3.6	1.17
G	349	2.66	20.94
A	350	3.93	3.62
L	351	6.86	3.04
D	352	12.75	5.27
E	353	19.4	4.43
A	354	23.54	6.57
A	355	28.19	2.11
A	356	36.1	10.11
Y	357	40.82	8.54
Q	358	33.73	14.3
S	359	34.42	16.14
R	360	52.84	4.33	32.4367
D	361	67.13	5.7	32.4367
Y	362	70.18	5.61	32.4367
Y	363	53.87	0.86	32.4367
N	364	27.52	10.11
F	365	16.53	6.29
P	366	9.08
L	367	5.7	8.49
A	368	4.49	14.85
L	369	3.31	14.98
A	370	2.24	12.41
G	371	1.45	8.82
P	372	1.35
P	373	1.5
P	374	1.65
P	375	1.82
P	376	2.09
P	377	2.63
P	378	3.95
P	379	7.83
H	380	16.37
P	381	24.82
H	382	35.34
A	383	40.2	4.93
R	384	36.07	2.01
I	385	23.94	10.79
K	386	16.1	3.48
L	387	10.3
E	388	6.71	2.8
N	389	4.4	5.98
P	390	4.57
L	391	7.5	6.68
D	392	14.54	12.54
Y	393	17.51	0.4
G	394	13.18	21.25
S	395	20.75
A	396	59.9	8	32.4367
W	397	86.47	6.76	32.4367
A	398	79.16	23.85	32.4367
A	399	56.11	10.72	32.4367
A	400	38.89	13.94	32.4367
A	401	29.85	8.29	32.4367
A	402	24.73	6.29	32.4367
Q	403	22.98	16.92	32.4367
C	404	28.3	15.03
R	405	37.88
Y	406	28.64	7.54
G	407	12.48	5.39
D	408	7.8	4.7
L	409	5.64	0.42
A	410	4.23	10.55
S	411	3.27	8
L	412	3.45	11.02
H	413	3.54	8.41
G	414	2.29
A	415	1.69	4.63
G	416	1.41	8.26
A	417	1.49	4.42
A	418	1.18	4.5
G	419	0.67	4.9
P	420	0.45
G	421	0.34
S	422	0.31
G	423	0.34
S	424	0.49	2.12
P	425	0.81
S	426	1.44
A	427	2.86	5.49
A	428	4.48	2.98
A	429	4.71	2.98
S	430	4.44
S	431	7.38
S	432	27.93
W	433	70.49	3.15	32.4367
H	434	66.69	1.17	32.4367
T	435	34.69	29.1	32.4367
L	436	20.76	7.55	32.4367
F	437	18.4	17.91	32.4367
T	438	14.64	16.73	32.4367
A	439	13.14	5.49
E	440	11.49	2.04
E	441	7.02	4.05
G	442	3.87	3.46
Q	443	3.68	4
L	444	4.61	13.23
Y	445	4.72	7.88
G	446	2.87	9.88
P	447	2.36
C	448	2.75	5.64

## Sheet: Figure 3b
AA	resnum	DIRseq	HN CSP (ppb)	shading
			5.06997	10.1399
	245
S	247	2.51
N	248	2.84
T	249	6.24
Y	250	14.56
D	251	15.85
V	252	11.28
D	253	8.6
M	254	6.3
V	255	5.67
D	256	5.83	0.54151
A	257	4.14	2.01551
N	258	2.35
L	259	1.87	1.34282
L	260	1.88	0.5151
M	261	2.01
E	262	1.78
G	263	1.14
G	264	1.07	1.34217
V	265	1.84
A	266	3.53
Q	267	5.04	0.48834
T	268	6.31
E	269	8.12
P	270	9.14
E	271	10.22
S	272	11.36
R	273	12.89
V	274	9.15
P	275	6.37
V	276	6.29
L	277	9.27	1.0043
D	278	16.97	1.59899
F	279	21.75
L	280	17.54	3.77114
E	281	13.9
P	282	10.91
M	283	11.22	2.01215
A	284	16.23	1.52062
E	285	22.43	0.486
E	286	23.16	1.62382
E	287	17.18
S	288	11.36
D	289	9.71
L	290	8.22
E	291	6.55
P	292	4.1
S	293	2.7
I	294	2.43
P	295	2.62
S	296	3.31
E	297	4.67	3.53619
C	298	4.88	2.39813
M	299	4.59
L	300	5.39
P	301	8.34
R	302	11.34	3.30278
S	303	8.76	0.50954
G	304	9.43
F	305	18.98	1.36274
P	306	32.25
R	307	44.27
A	308	42.17	6.17271	10.1399
L	309	39		10.1399
P	310	56.75		10.1399
A	311	88.52		10.1399
W	312	97.36	6.58596	10.1399
A	313	96.26	4.33585	10.1399
R	314	89.25	3.22364	10.1399
P	315	73.2		10.1399
D	316	60.46		10.1399
Y	317	42.82	0.99912
N	318	18.69
P	319	10.61
P	320	9.59
L	321	12.06
V	322	22.16
E	323	50.14	0.99836
S	324	86.41
W	325	98.24	3.27395
R	326	98.69	4.72209
R	327	95.39
P	328	83.03
D	329	71.69	3.04067
Y	330	58.71	2.83364
Q	331	30.71	1.4887
P	332	12.55
P	333	6.66
T	334	4.73	10.721
V	335	4.09	1.61747
A	336	3.53
G	337	2.88
C	338	3.46	3.27226
A	339	4.38	7.07385
L	340	4.33
P	341	4.41
P	342	5.59
P	343	9.42
K	344	17.5
K	345	21.22
A	346	15.4
P	347	9.29
T	348	7.04
P	349	7.59
P	350	11.98
P	351	29.05
R	352	65.61
R	353	83.56
R	354	81.97
R	355	57.43
T	356	18.08
V	357	4.93
G	358	2.26	0.47659
L	359	1.95
S	360	2.3
E	361	2.76
S	362	2.44
T	363	2.27	3.76042
I	364	2.48
S	365	3.38	1.32912
E	366	5.51
A	367	6.51
L	368	5.85
Q	369	5.72
Q	370	5.71	2.0009
L	371	5.81	1.32835
A	372	6.66	1.6127
I	373	7.71	3.2936
K	374	8.99	3.29346
T	375	8.31
F	376	6.13
G	377	3.3	1.22412
Q	378	2.34
P	379	1.8
P	380	1.29
S	381	0.93	2.80118
S	382	0.8
G	383	0.97
D	384	1.48
A	385	1.36	3.29205
G	386	0.81	1.48159
S	387	0.62
S	388	0.62
T	389	0.67	3.93808
G	390	0.77	3.55001
A	391	1.05
G	392	1.39
A	393	2.3	2.04965
A	394	3.06
E	395	2.25	0.57525
S	396	1.01
G	397	0.53
G	398	0.46	1.58348
P	399	0.6
T	400	0.73
S	401	0.78	4.22101
P	402	0.88
G	403	1.15	1.58283
E	404	1.94
P	405	2.57
A	406	2.68	0.54794
P	407	2.25
S	408	2.01	1.53045
E	409	1.95
T	410	1.32
G	411	0.89	0.54731
S	412	0.93
A	413	1.14	1.3229
S	414	1.05	5.56415
S	415	1
M	416	1.16	0.49494
P	417	1.42
P	418	1.74
L	419	2.18
E	420	2.47
G	421	2.31
E	422	2.57
P	423	2.36
G	424	2.38	0.54562
D	425	3.68
P	426	5.2
D	427	6.37	0.57113
L	428	6.5	1.96752
E	429	6.42
S	430	6.02	3.54486
D	431	6.6
Q	432	6.23	1.24284
V	433	5.5
E	434	5.12
L	435	3.97	3.51834
Q	436	3
P	437	2.21
P	438	1.67
P	439	1.28
Q	440	0.84
G	441	0.46
G	442	0.34
G	443	0.4
V	444	0.65
A	445	0.9	2.01706
P	446	0.73
G	447	0.49	0.98231
S	448	0.42	5.55976
G	449	0.45	1.49928
S	450	0.67
G	451	1.52
S	452	6.82	2.84375
W	453	22.23	3.30913
S	454	15.43	1.31762
T	455	7.71
C	456	5.92
S	457	6.94	0.98103
E	458	11.93
E	459	17.54	1.49802
D	460	17.6	1.31683
D	461	12.01	1.96327
T	462	6.38
T	463	4.03	1.57507
V	464	3.43
C	465	3.63
C	466	4.23

## Sheet: Figure 3c
AA	resnum	DIRseq	lines	shading
			100
	0
I	1	3.09
Q	2	4.66
R	3	6.18
T	4	4.84
P	5	4.15
K	6	4.39
I	7	4.07
Q	8	4.41
V	9	6.39
Y	10	10.31
S	11	13.18
R	12	18.52
H	13	16.39
P	14	8.64
A	15	4.95
E	16	2.64
N	17	1.24
G	18	0.96
K	19	1.14
S	20	1.09
N	21	1.24
F	22	1.72
L	23	1.55
N	24	1.44
C	25	2.23
Y	26	3.17
V	27	2.23
S	28	1.54
G	29	2.03
F	30	4.69
H	31	6.25
P	32	3.94
S	33	2.84
D	34	3.04
I	35	3.22
E	36	3.39
V	37	3.21
D	38	2.98
L	39	2.44
L	40	2.24
K	41	2.11
N	42	1.6
G	43	2.02
E	44	5.1
R	45	10.07
I	46	10.86
E	47	12
K	48	12.37
V	49	11.41
E	50	13.05
H	51	12.35
S	52	8.07
D	53	6.24
L	54	5.26
S	55	6.35
F	56	11.16
S	57	19
K	58	42.48
D	59	76.06
W	60	87.3
S	61	77.7
F	62	67.63	100
Y	63	54.63	100
L	64	34.54
L	65	32.1
Y	66	44.79
Y	67	44.37	100
T	68	30.24
E	69	23.89
F	70	17.78
T	71	9.65
P	72	6.73
T	73	8.14
E	74	14.52
K	75	23.61
D	76	30.29
E	77	35.39
Y	78	35.02
A	79	24.24
C	80	16.46
R	81	11.89
V	82	6.07
N	83	4.04
H	84	4.02
V	85	2.82
T	86	1.86
L	87	1.51
S	88	1.62
Q	89	2.34
P	90	3.81
K	91	6.31
I	92	9.43
V	93	21.95
K	94	64.48
W	95	88.75
D	96	84.46
R	97	62.87
D	98	29.23
M	99	10.95
	100
