# Supplementary material for: DIRseq as a method for predicting drug-interacting residues of intrinsically disordered proteins from sequences
Source: eLife. 2025 Oct 7;14:RP107470. doi: 10.7554/eLife.107470 (PMC12503486; doi:10.7554/eLife.107470)
Supplement: Figure 4—source data 1. [file elife-107470-fig4-data1.xlsx]

## Sheet: Figure 4a
AA	resnum	DIRseq	CSP (ppb)	shading
			41.6722	83.3444
	0
K	1	50.02
C	2	35.82
N	3	25.32
T	4	26.73
A	5	32.7	15.4614
T	6	35.58	10.0245
C	7	40.2	16.6462
A	8	46.76	27.6928
T	9	52.94	21.2945	83.3444
Q	10	64.36	36.1322	83.3444
R	11	71	56.2365	83.3444
L	12	62.73	24.604	83.3444
A	13	52.19	33.3854	83.3444
N	14	47.68	16.6527	83.3444
F	15	51.14	17.9933	83.3444
L	16	46.69	28.5633	83.3444
V	17	43.33	60.3018	83.3444
H	18	38.82	56.5204	83.3444
S	19	22.37	33.84
S	20	12.29	40.3101
N	21	9.78	21.3246
N	22	12.53	26.7383
F	23	17.79	41.492
G	24	16.67	35.0076
A	25	15.88	22.4458
I	26	13.22	34.6208
L	27	9.72	40.8666
S	28	7.25	32.4286
S	29	6.16	23.1156
T	30	5.6	23.3619
N	31	4.95	26.6039
V	32	4.65	32.8078
G	33	4.56	26.0818
S	34	5.85	16.6317
N	35	10.45	7.15642
T	36	25.82	26.1201
Y	37	49.75	36.0064

## Sheet: Figure 4b
AA	resnum	DIRseq	lines	shading
			100
	0
D	1	31.41
A	2	45.57
E	3	63.63
F	4	78.79
R	5	82.95	100
H	6	73.04
D	7	43.75
S	8	20.07
G	9	18.31
Y	10	32.73
E	11	42
V	12	46.56	100
H	13	58.81	100
H	14	60.25
Q	15	47.39
K	16	34.19	100
L	17	24.71	100
V	18	27.12	100
F	19	40.87	100
F	20	45.5	100
A	21	35	100
E	22	21.93	100
D	23	10.13	100
V	24	3.44
G	25	1.46
S	26	1.11
N	27	1.29
K	28	1.66
G	29	1.57
A	30	1.55
I	31	1.27	100
I	32	0.89	100
G	33	0.68
L	34	0.68
M	35	0.68
V	36	0.57
G	37	0.44
G	38	0.48
V	39	0.74
V	40	1.23
I	41	2.04
A	42	3.33

## Sheet: Figure 4c
AA	resnum	DIRseq	Ha CSP (ppb)	shading
			80.6353	161.271
	360
E	363	51.83		161.271
R	364	67.15		161.271
Q	365	72.28		161.271
R	366	75.05		161.271
R	367	64.73	81.2	161.271
N	368	42.99	49	161.271
E	369	36.64		161.271
L	370	40.89	99	161.271
K	371	53.83	56.5	161.271
R	372	60.02	15	161.271
S	373	57.32	60	161.271	161.271
F	374	63.55	130	161.271	161.271
F	375	64.47	128	161.271	161.271
A	376	54.08			161.271
L	377	47.76			161.271
R	378	49.25	45.3		161.271
D	379	39.02	36		161.271
Q	380	22.84	0		161.271
I	381	14.03	73.3		161.271
P	382	11.97	58.3
E	383	12.04	50.5
L	384	10.43	73.3
E	385	8.17	28
N	386	5.85	30
N	387	6.77	28
E	388	12.99
K	389	19.71
A	390	18.93
P	391	15.84	11.3
K	392	13.67
V	393	9.75	32.1
V	394	7.67	32.1
I	395	8.28	30
L	396	12.61
K	397	22.26				161.271
K	398	28.26	2.3			161.271
A	399	25.09	87			161.271
T	400	22.12	47.4			161.271
A	401	25.02	48.9			161.271
Y	402	23.95	58			161.271
I	403	13.35	60			161.271
L	404	7.28	71			161.271
S	405	5.73	107			161.271
V	406	7	10
Q	407	11.25	28.2
A	408	18.26	30.1
E	409	25.12	1.8
E	410	27.47	1.8
Q	411	26.25	3.8
K	412	24.13	39
	415
